# Supplementary material
Source: PubMed Central journal article supplement (PMC7758683)
Supplement: Supplemental_material.pdf [file Supplemental_material.pdf]

JVDI: Supplementary material

Stout AE, et al. Infectious disease surveillance of apparently healthy horses at a multi-day show using a novel nanoscale real-time PCR panel

**Supplementary Table 1.** Primers and probes unique to the enteric nanoscale PCR panel used in our study.

| Pathogen target                 | Forward primer                     | Reverse primer                  | Probe                                  | Reference  |
|---------------------------------|------------------------------------|---------------------------------|----------------------------------------|------------|
| Equine rotavirus (VP4)          | RGGTGGTGAYTATAMSTT<br>CGCATT       | TYACAGCGCCTCCAGTCATTAC          | CAGTRGGTCAGTGGC                        | This study |
| Bovine rotavirus (VP6)          | TCAACATGG ATGTCCTKT<br>AYTCCT      | YCCYCCAGT TTGGAAAYTCATT         | TCAAAAACCTCTTAAAGATGCW<br>AG           | 1          |
| <i>E. coli</i> CNF1             | GCAAGAGAGTGTGTCAGTTC<br>TGCATTT    | TGCCTGATGACCTTTTCTCATTT         | TTCAAGTCACCATCCTCCAAAG<br>GCAAA        | 5          |
| <i>E. coli</i> STX2             | TTTGTYACTGTSACAGCW<br>GAAGCYTTA CG | CCCCAGTTCARWGTRAGRTCM<br>ACRTC  | TCGTCAGGCACTGTCTGAAACT<br>GCTCC        | 6          |
| <i>E. coli</i> K99              | GCTATTAGTGGTCATGGC<br>ACTGTAG      | TTTGTTTTCGCTAGGCAGTCAT<br>TA    | ATTTTAAACTAAAACCAGCGCC<br>CGGCA        | 8          |
| <i>E. coli</i> F17              | GCAGAAAATTCAATTTAT<br>CCTT         | AATTGTACCGTCATAAGCAAGC          | GGCGGCTGCGTCATCTTCTGCT                 | 8          |
| <i>E. coli</i> F41              | CTGCTGATTGGACGGAAG<br>GT           | CCAGTCTTCCATAGCCATTTAA<br>CAG   | TGATGTAATTTACCACCAATA<br>ATAATGTCACCTG | 8          |
| <i>E. coli</i> 987p             | CCAAAGTATTCCACTGCA<br>AGCA         | GCCGTAACCTCCACGTTTGT            | ACATCGGAACCACCACAGGGA<br>ATCCT         | 8          |
| <i>E. coli</i> Sta              | GCAAAATCCGTTTAACTA<br>ATCTCAA      | ACAGAAATAAAAATTGCCAAC<br>ATTAGC | TTACCTCCCGTCATGTTGTTTCA<br>CGGAT       | 8          |
| <i>E. coli</i> LT               | CCGGCAGAGGATGGTTA<br>CAG           | GAATCCAGGGTTCTTCTCTCCA<br>A     | TAGCAGGTTTCCCACCGGATCA<br>CC           | 8          |
| <i>Clostridioides difficile</i> | GGTATTACCTAATGCTCC<br>AAATAG       | TTTGTGCCATCATTCTTAAGC           | CCTGGTGTCCATCCTGTTTC                   | 4          |
| <i>Clostridium perfringens</i>  | AAATGTAACAGCAGGGG<br>CA            | TGAAATTGCAGCAACTCTAGC           | ATGTCTTCTTTTCCATTTACAGG<br>CTTAGAA     | 3          |

|                               |                                                                         |                              |                                     |                               |
|-------------------------------|-------------------------------------------------------------------------|------------------------------|-------------------------------------|-------------------------------|
| <i>Cryptosporidium</i> spp.   | GGGTTGTATTTATTAGAT<br>AAAGAACCA                                         | AGGCCAATACCCTACCGTCT         | GTGACATATCATTCAAGTTTCT<br>GAC       | 7                             |
| <i>Cryptosporidium parvum</i> | CAAATTGATACCGTTTGT<br>CCTTCTG                                           | GGCATGTTCGATTCTAATTCAGC<br>T | TGCCATACATTGTTGTCCTGAC<br>AAATTGAAT | 2                             |
| <i>Listeria</i> spp.          | Commercial assay (MicroSEQ <i>Listeria</i> spp. detection kit)          |                              |                                     | Applied Biosystems<br>4427410 |
| <i>Listeria monocytogenes</i> | Commercial assay (MicroSEQ <i>Listeria monocytogenes</i> detection Kit) |                              |                                     | Applied Biosystems<br>4403874 |

### References

1. Cho Y-I, et al. Development of a panel of multiplex real-time polymerase chain reaction assays for simultaneous detection of major agents causing calf diarrhea in feces. *J Vet Diagn Invest* 2010;22:509–517.
2. Guy RA, et al. Real-time PCR for quantification of *Giardia* and *Cryptosporidium* in environmental water samples and sewage. *Appl Environ Microbiol* 2003;69:5178–5185.
3. Karpowicz E, et al. qPCR quantification and genetic characterization of *Clostridium perfringens* populations in biosolids composted for 2 years. *J Appl Microbiol* 2010;108:571–581.
4. Liu J, et al. A laboratory-developed TaqMan Array Card for simultaneous detection of 19 enteropathogens. *J Clin Microbiol* 2013;51:472–480.
5. Massoud BZ, et al. Characterization of uropathogenic *Escherichia coli* strains isolated from community acquired and hospital acquired infections in Alexandria. *Egypt J Med Microbiol* 2007;16:513–520.

6. Perelle S, et al. Detection by 5'-nuclease PCR of Shiga-toxin producing *Escherichia coli* O26, O55, O91, O103, O111, O113, O145 and O157:H7, associated with the world's most frequent clinical cases. *Mol Cell Probes* 2004;18:185–192.
- 7 . Stroup SE, et al. Real-time PCR detection and speciation of *Cryptosporidium* infection using Scorpion probes. *J Med Microbiol* 2006;55:1217–1222.
8. West DM, et al. Rapid detection of *Escherichia coli* virulence factor genes using multiplex real-time TaqMan PCR assays. *Vet Microbiol* 2007;122:323–331.
